# Supplementary material for: Fine scale mapping of genomic introgressions within the Drosophila yakuba clade
Source: PubMed Central journal article supplement (PMC5600410; doi:10.1371/journal.pgen.1006971), 2017-09-05

A) *san*-into-*yak*  
P = 0

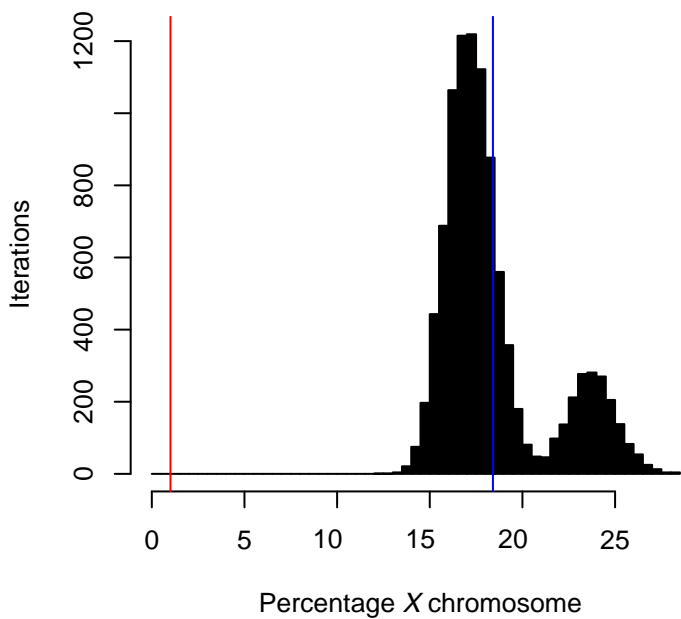

B) *yak*-into-*san*  
P = 0

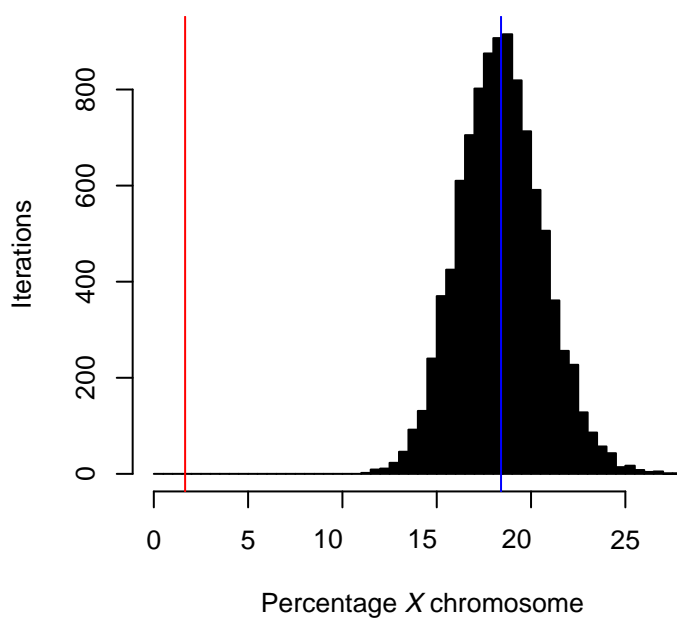

C) *tei*-into-*yak*  
P = 0

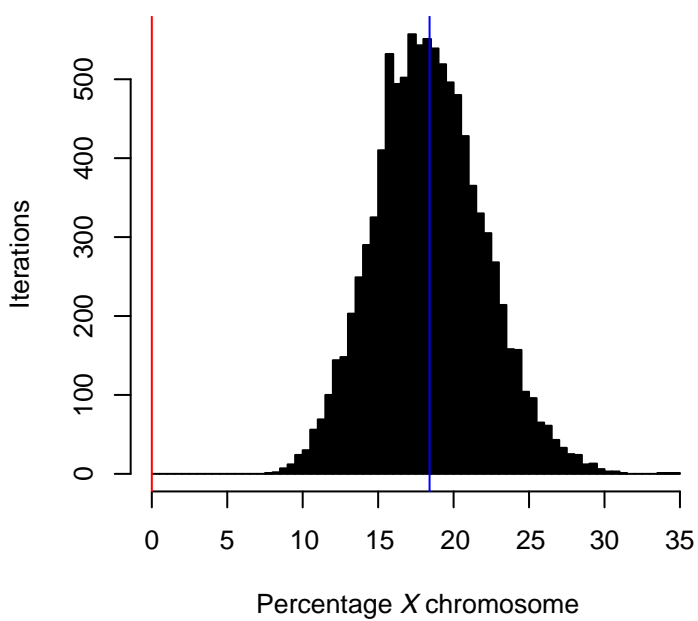

D) *yak*-into-*tei*  
P = 0.0221

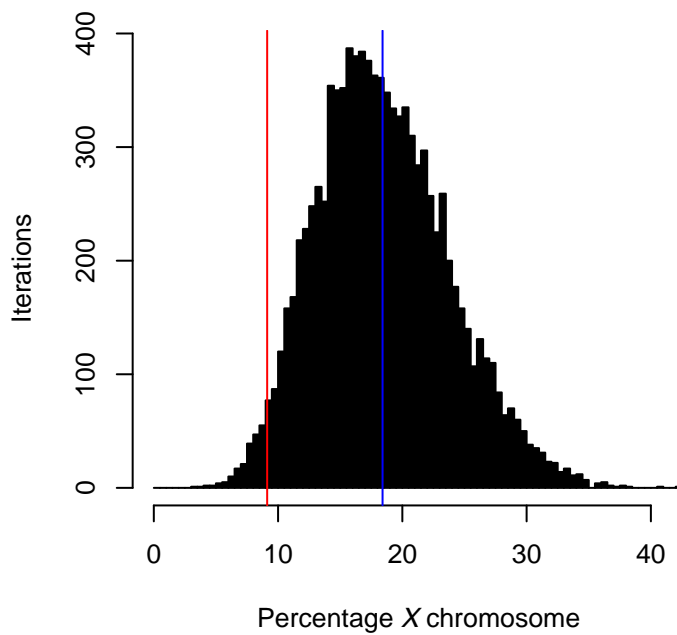

Supplement: pgen.1006971.s006.pdf [file pgen.1006971.s006.pdf]
