# Supplementary material for: Fine scale mapping of genomic introgressions within the Drosophila yakuba clade
Source: PubMed Central journal article supplement (PMC5600410; doi:10.1371/journal.pgen.1006971), 2017-09-05

A)

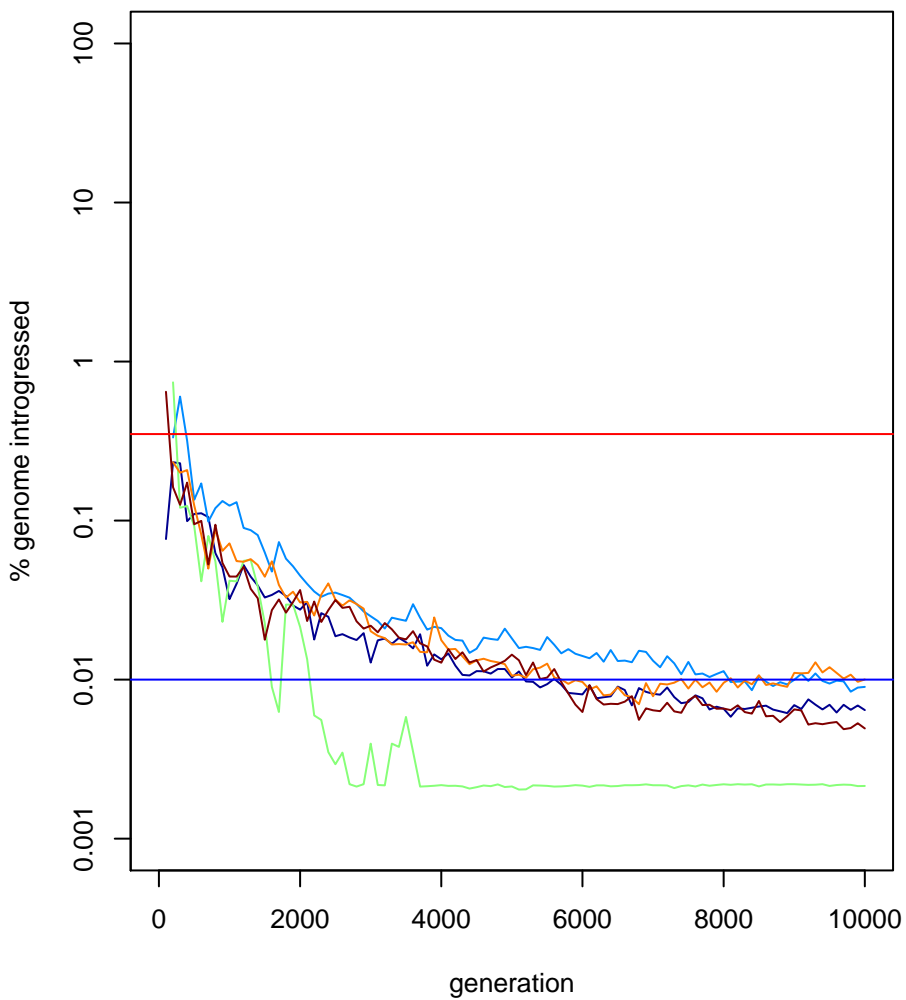

B)

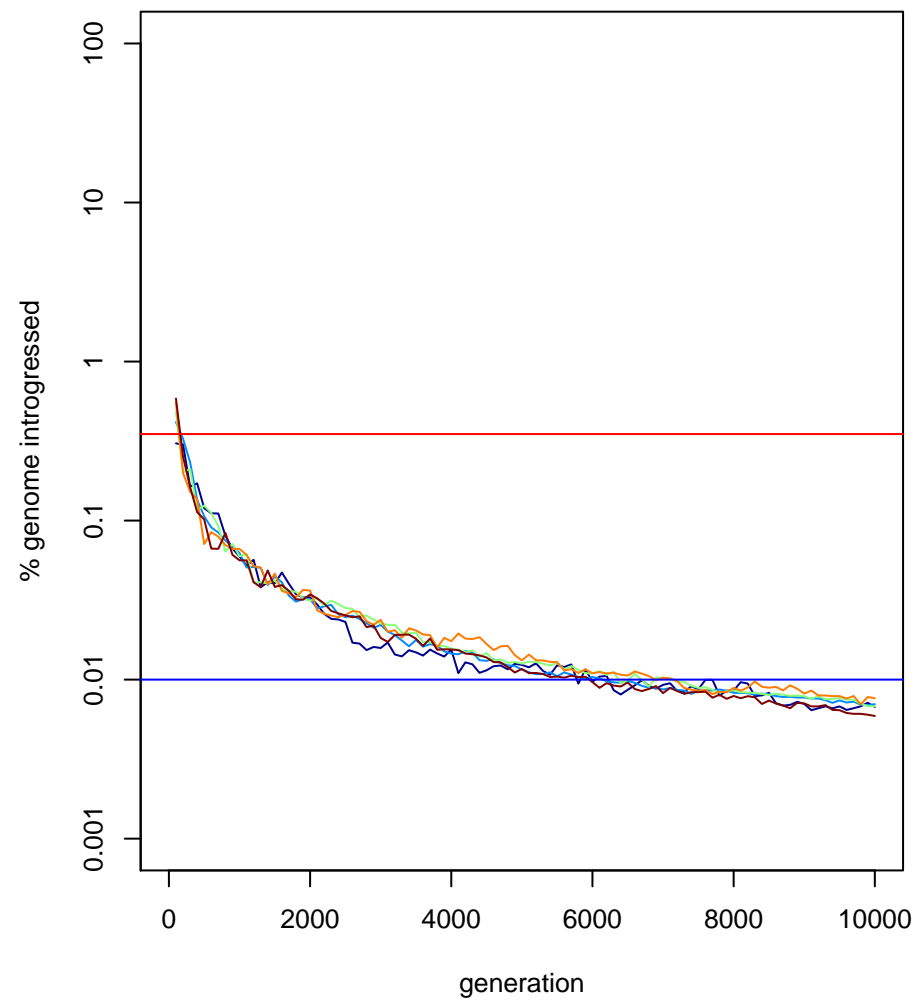

C)

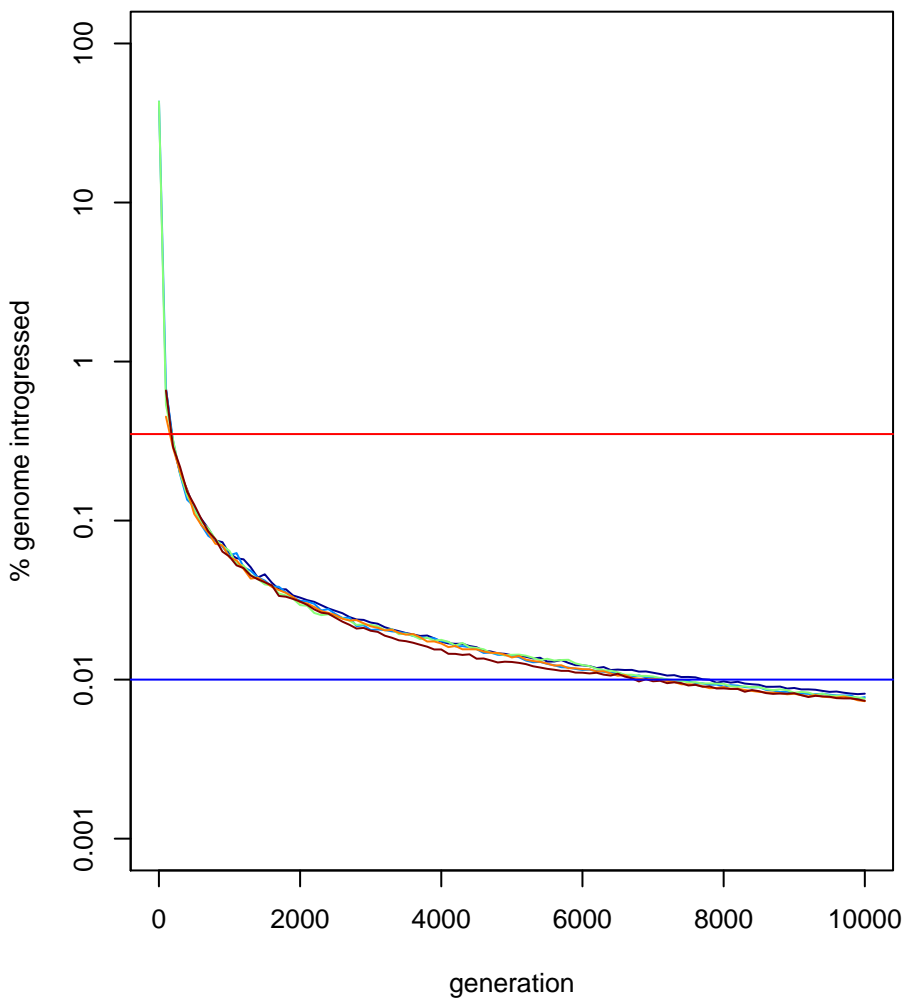

D)

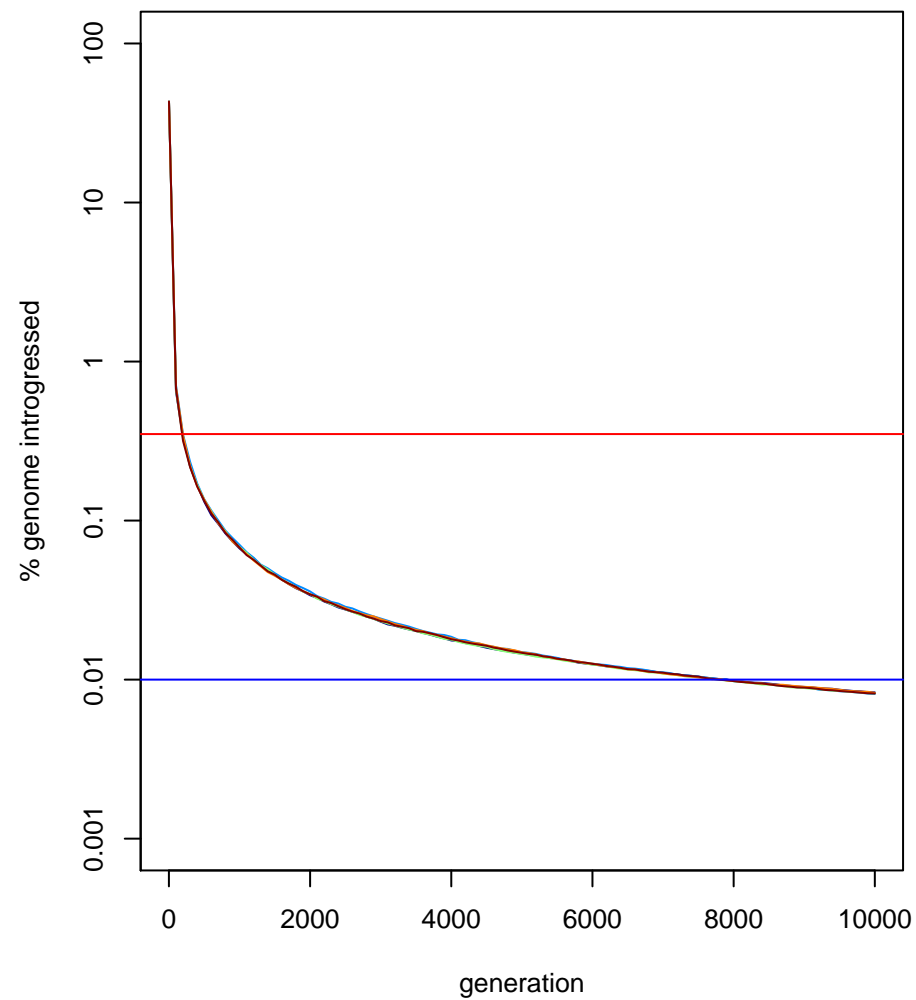

Supplement: pgen.1006971.s007.pdf [file pgen.1006971.s007.pdf]
