# Supplementary material for: Fine scale mapping of genomic introgressions within the Drosophila yakuba clade
Source: PubMed Central journal article supplement (PMC5600410; doi:10.1371/journal.pgen.1006971), 2017-09-05

A)  $N_e = 10000$ ; generation len = 14

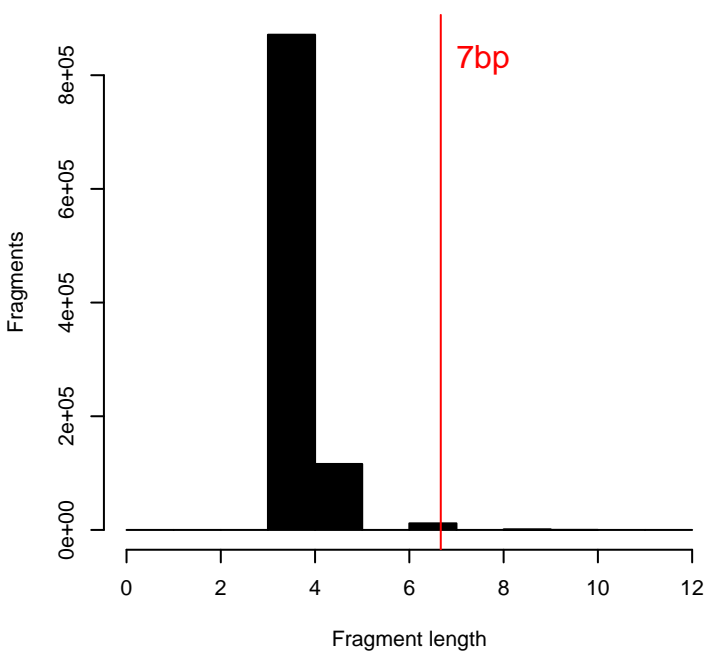

B)  $N_e = 10000$ ; generation len = 21

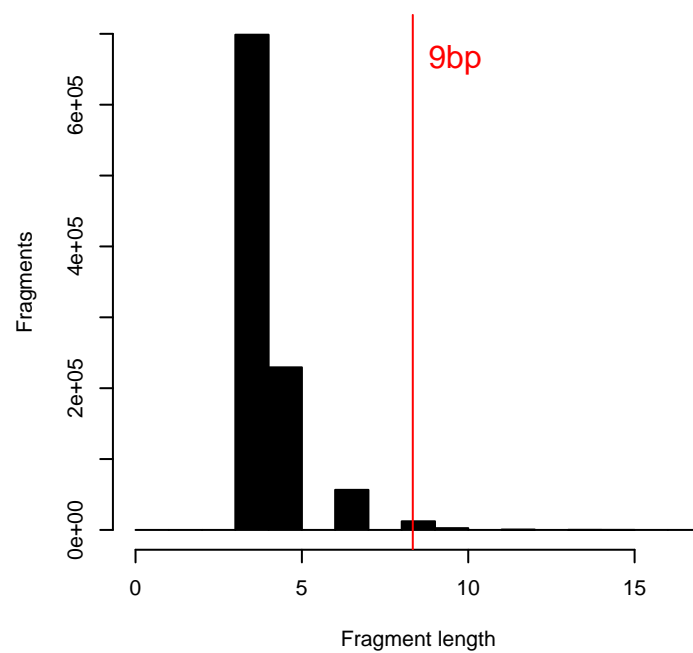

C)  $N_e = 10000$ ; generation len = 28

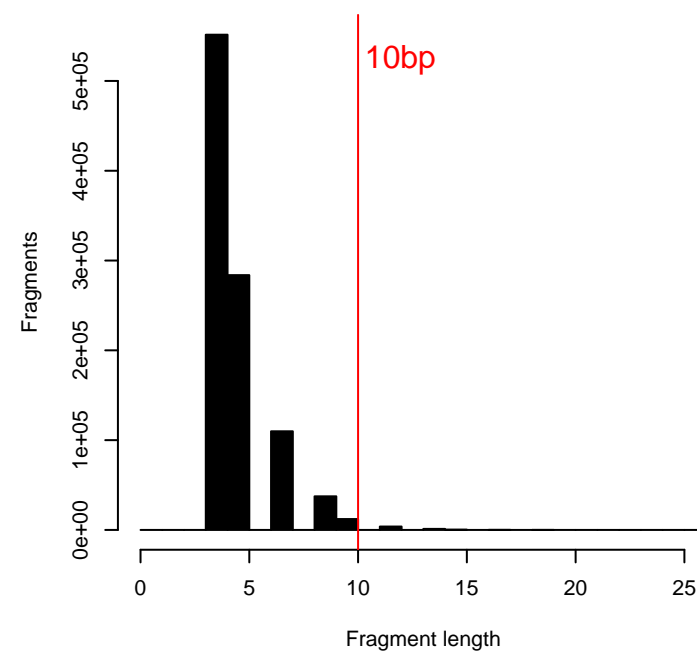

D)  $N_e = 1e+06$ ; generation len = 14

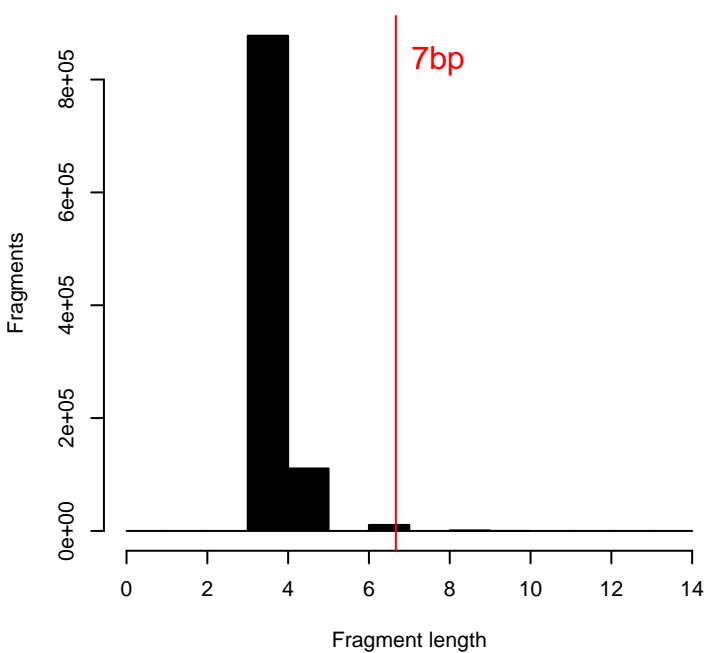

E)  $N_e = 1e+06$ ; generation len = 21

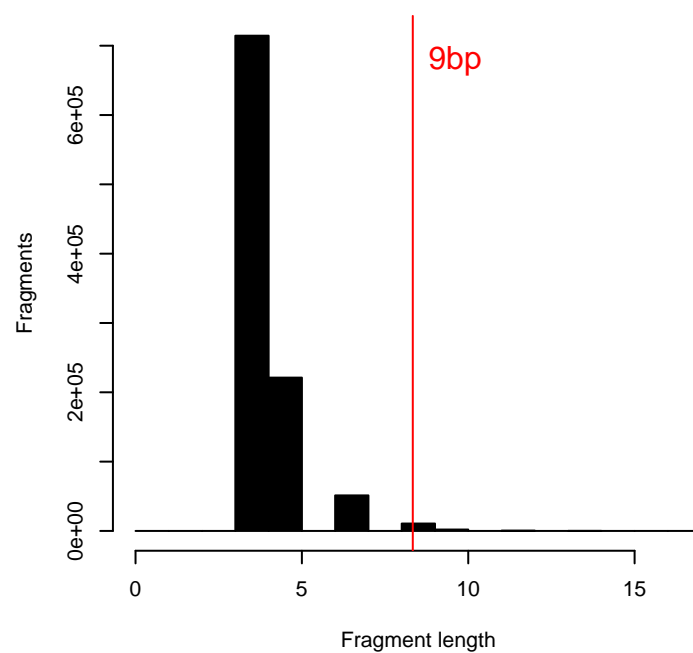

F)  $N_e = 1e+06$ ; generation len = 28

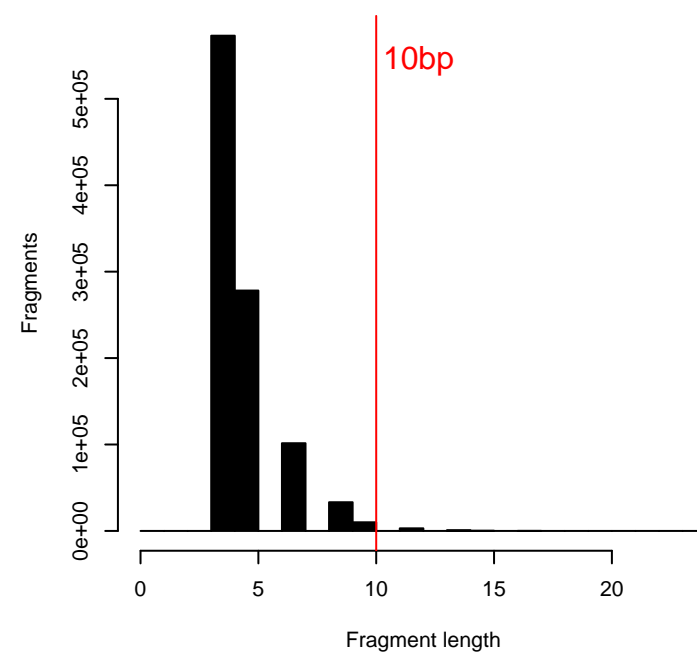

G)  $N = 10000$

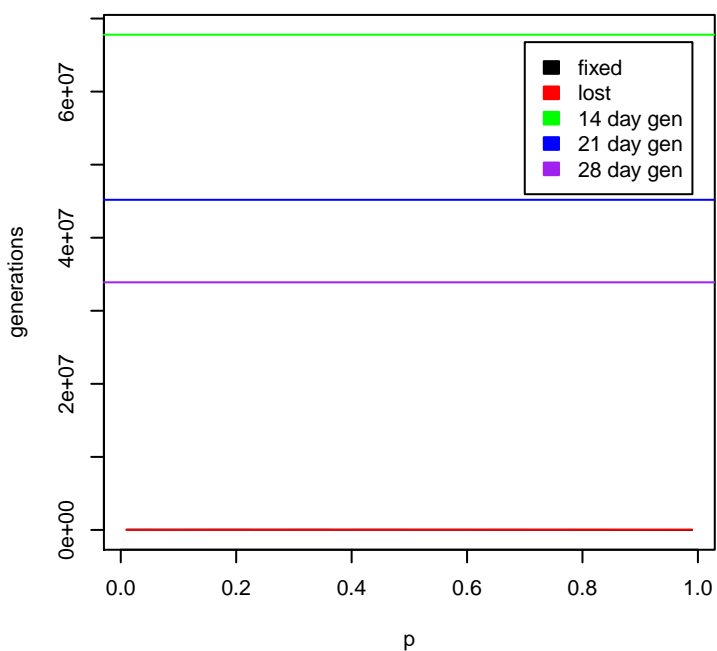

H)  $N = 1e+06$

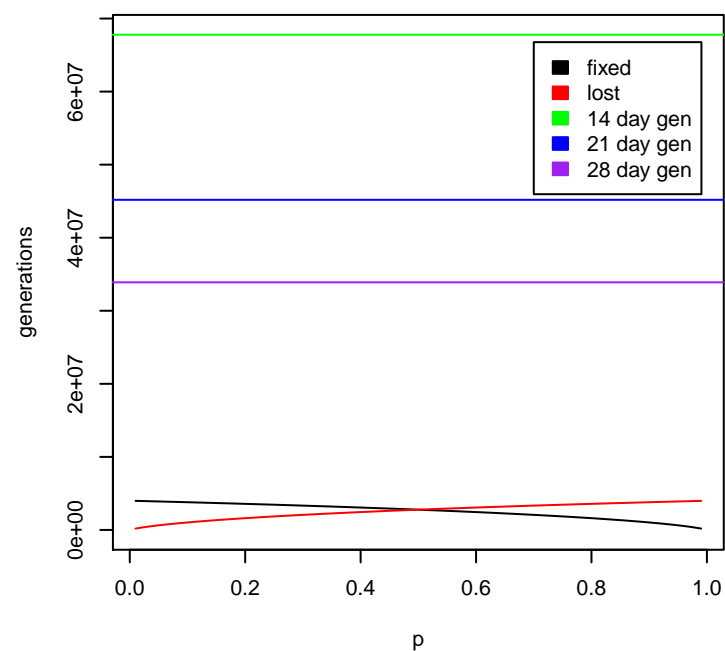

Supplement: pgen.1006971.s010.pdf [file pgen.1006971.s010.pdf]
